# Supplementary material for: A quantitative evaluation of computational methods to accelerate the study of alloxazine-derived electroactive compounds for energy storage
Source: PubMed Central journal article supplement (PMC7892830; doi:10.1038/s41598-021-83605-2), 2021-02-18
Supplement: 41598_2021_83605_MOESM1_ESM.pdf [file 41598_2021_83605_MOESM1_ESM.pdf]

# Supplementary Information

## A quantitative evaluation of computational methods to accelerate the study of alloxazine-derived electroactive compounds for energy storage

*Qi Zhang*<sup>1,2,3</sup>, *Abhishek Khetan*<sup>1,2</sup>, *Süleyman Er*<sup>1,2\*</sup>

<sup>1</sup> DIFFER – Dutch Institute for Fundamental Energy Research, De Zaale 20, 5612 AJ Eindhoven, The Netherlands

<sup>2</sup> CCER – Center for Computational Energy Research, De Zaale 20, 5612 AJ Eindhoven, The Netherlands

<sup>3</sup> Department of Applied Physics, Eindhoven University of Technology, 5600 MB Eindhoven, The Netherlands

\* E-mail: [s.er@diffen.nl](mailto:s.er@diffen.nl)

### Explanation of the abbreviations used in the below tables:

SMILES: simplified molecular-input line-entry system

FF: force field

SEQM: semi-empirical quantum mechanics

DFTB: density functional tight-binding

DFT: density functional theory

OPT: geometry optimization

SPE: single point energy

SOL: implicit aqueous medium

R<sup>2</sup>: coefficient of determination

RMSE: root-mean-square error

MAE: mean absolute error

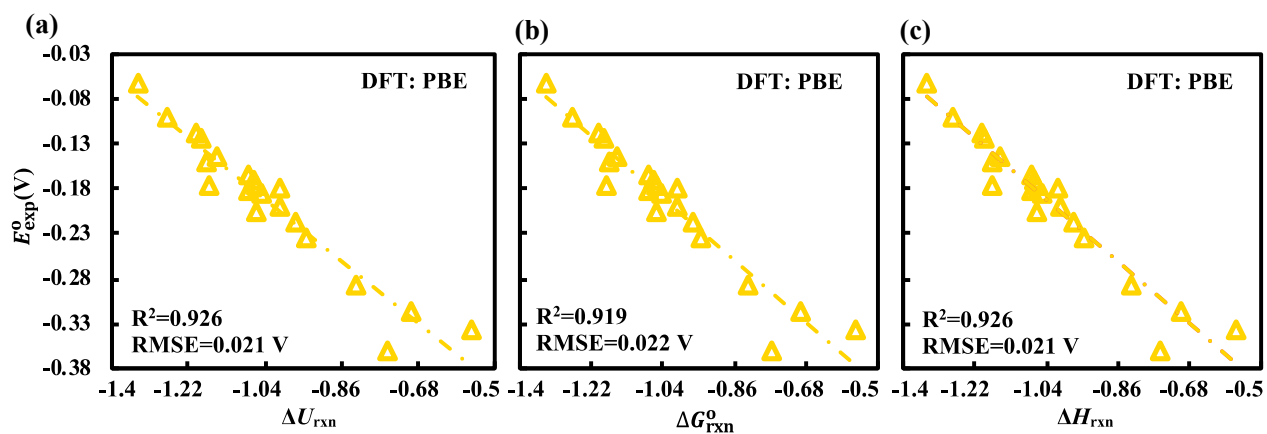

**Figure S1.** Performance of (a)  $\Delta U_{\text{rxn}}$ , (b)  $\Delta G_{\text{rxn}}^0$ , and (c)  $\Delta H_{\text{rxn}}$  as descriptors for the prediction of experimentally measured redox potentials,  $E_{\text{exp}}^0$ . The DFT computations are performed using PBE functional.

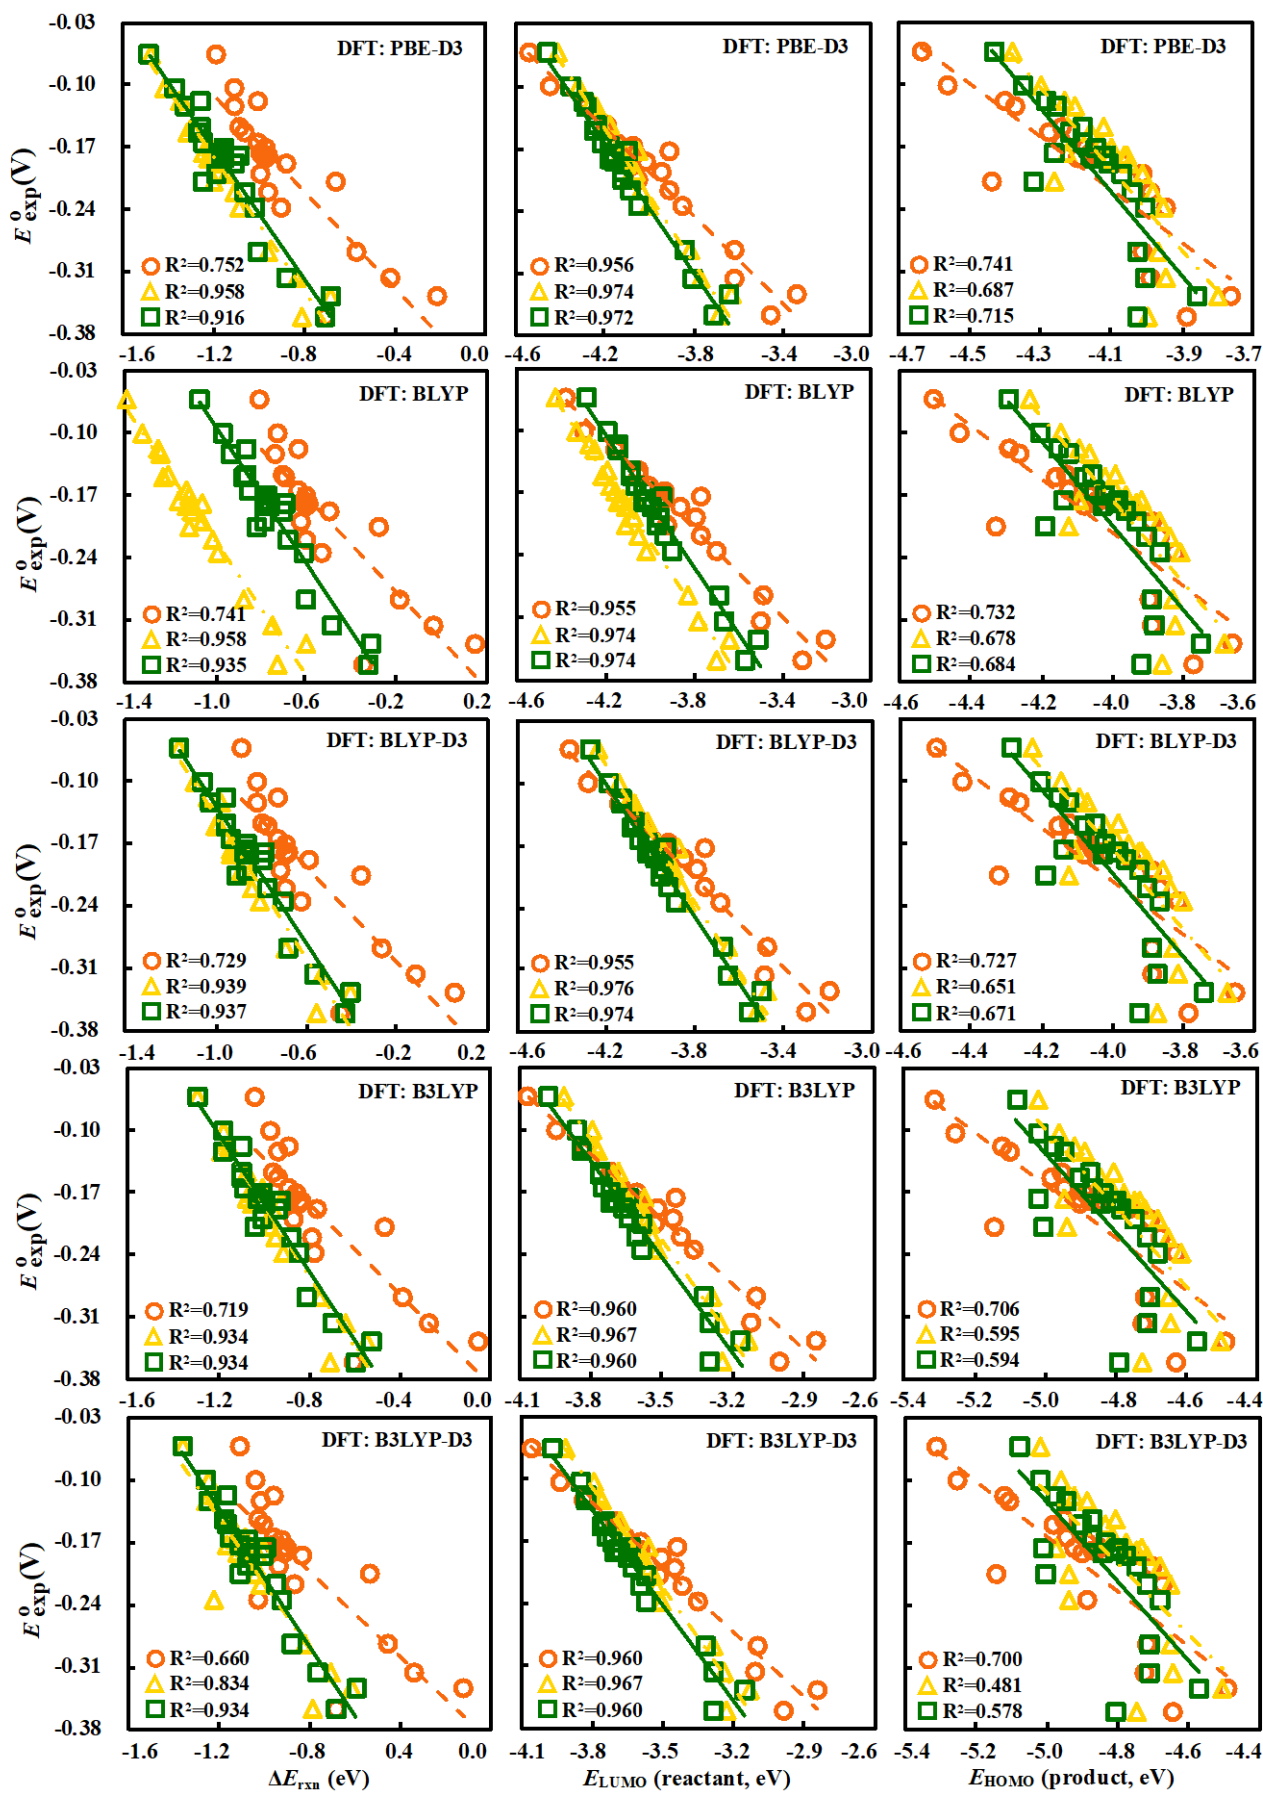

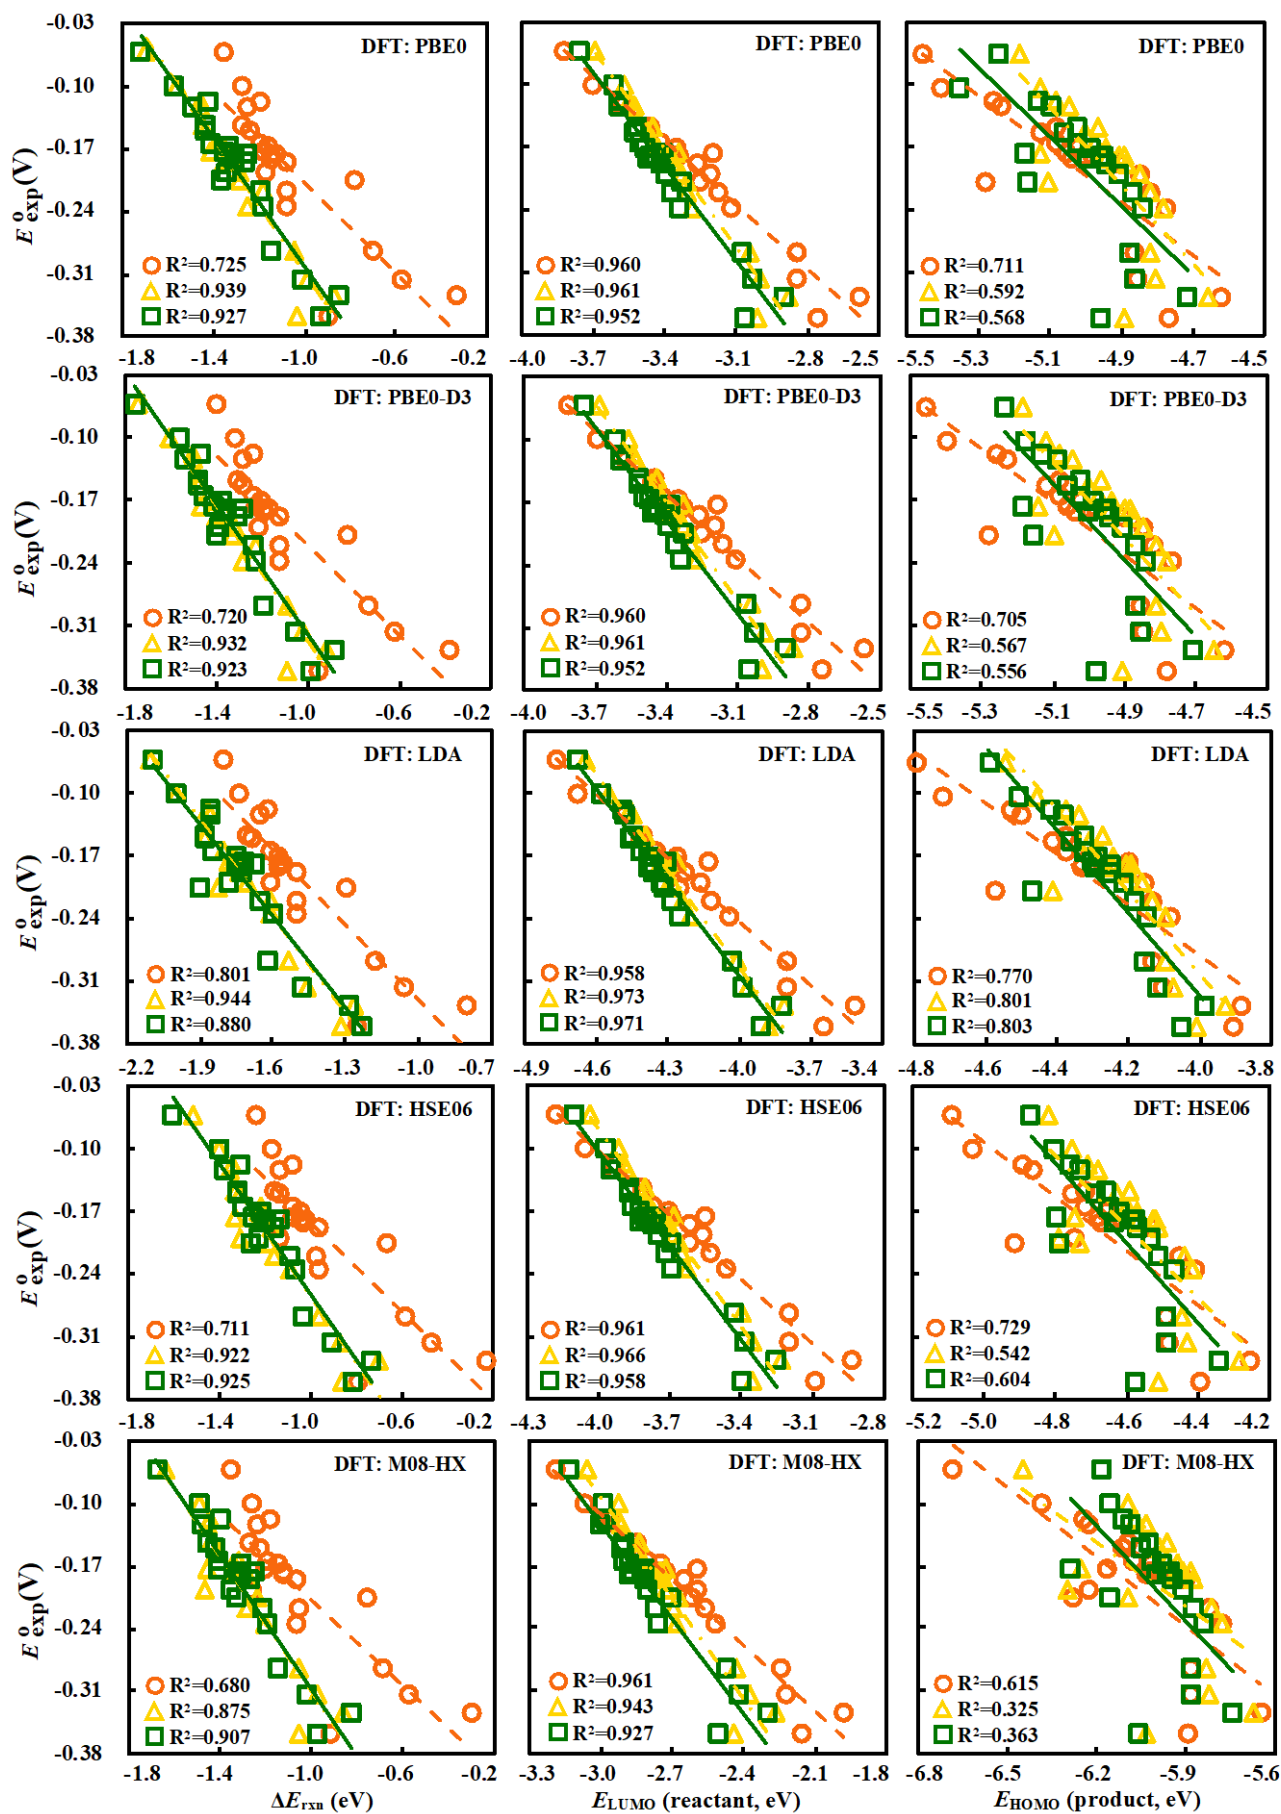

**Figure S2.** Performance comparisons of exchange-correlation functionals for the prediction of experimentally measured redox potentials,  $E_{\text{exp}}^{\circ}$ . The scatter plots in columns from left to right show linear correlations (versus  $E_{\text{exp}}^{\circ}$ ) of the DFT calculated energy difference between the reactant and product compounds ( $\Delta E_{\text{rxn}}$ ), the LUMO energy ( $E_{\text{LUMO}}$ ) of the reactant molecules and the HOMO energy ( $E_{\text{HOMO}}$ ) of the product molecules. The color orange represents both OPT and SPE in gas-phase, the color yellow represents OPT in gas-phase followed by SPE with SOL (including implicit aqueous solvation), and the color green represents both OPT and SPE with SOL.

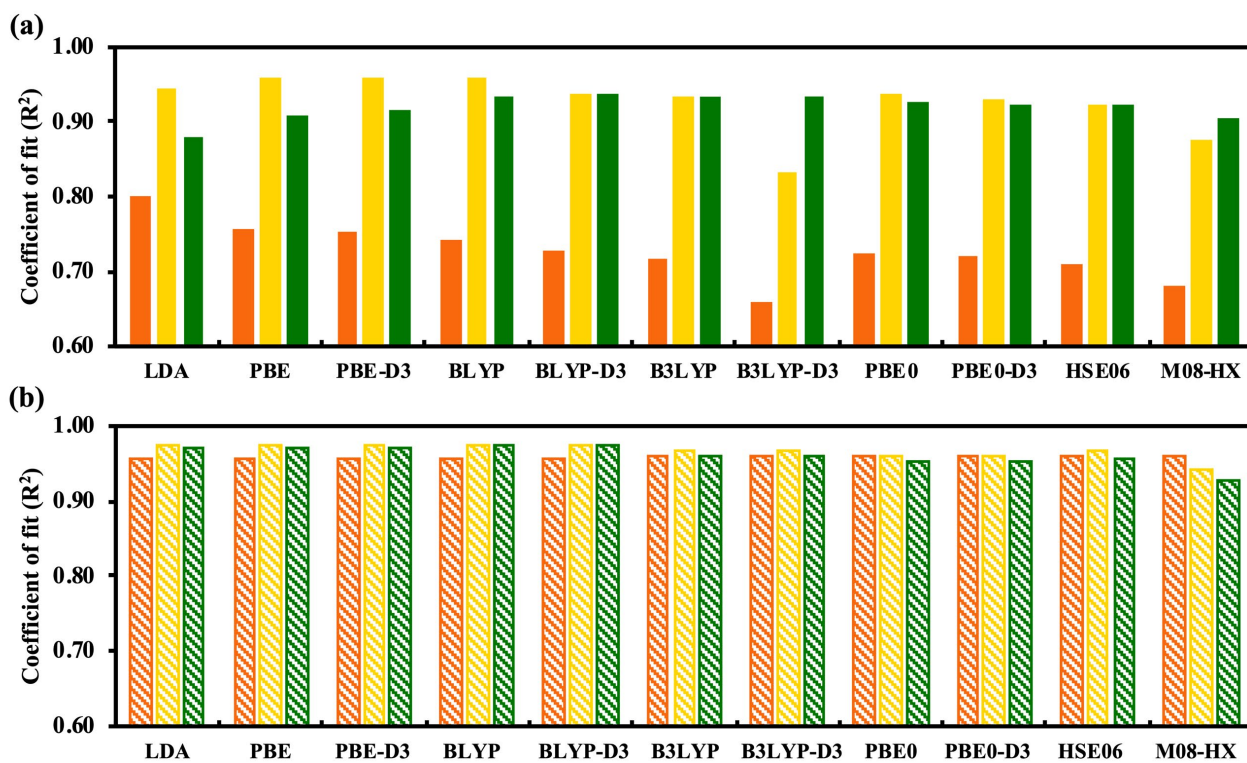

**Figure S3.** Performance comparisons of exchange-correlation functionals for the prediction of experimentally measured redox potentials,  $E_{\text{exp}}^0$ . The bar plots (a) and (b) show  $R^2$  for  $\Delta E_{\text{rxn}}$  and  $E_{\text{LUMO}}$ , respectively. The color orange represents both OPT and SPE in gas-phase, the color yellow represents OPT in gas-phase followed by SPE with SOL, and the color green represents both OPT and SPE with SOL.

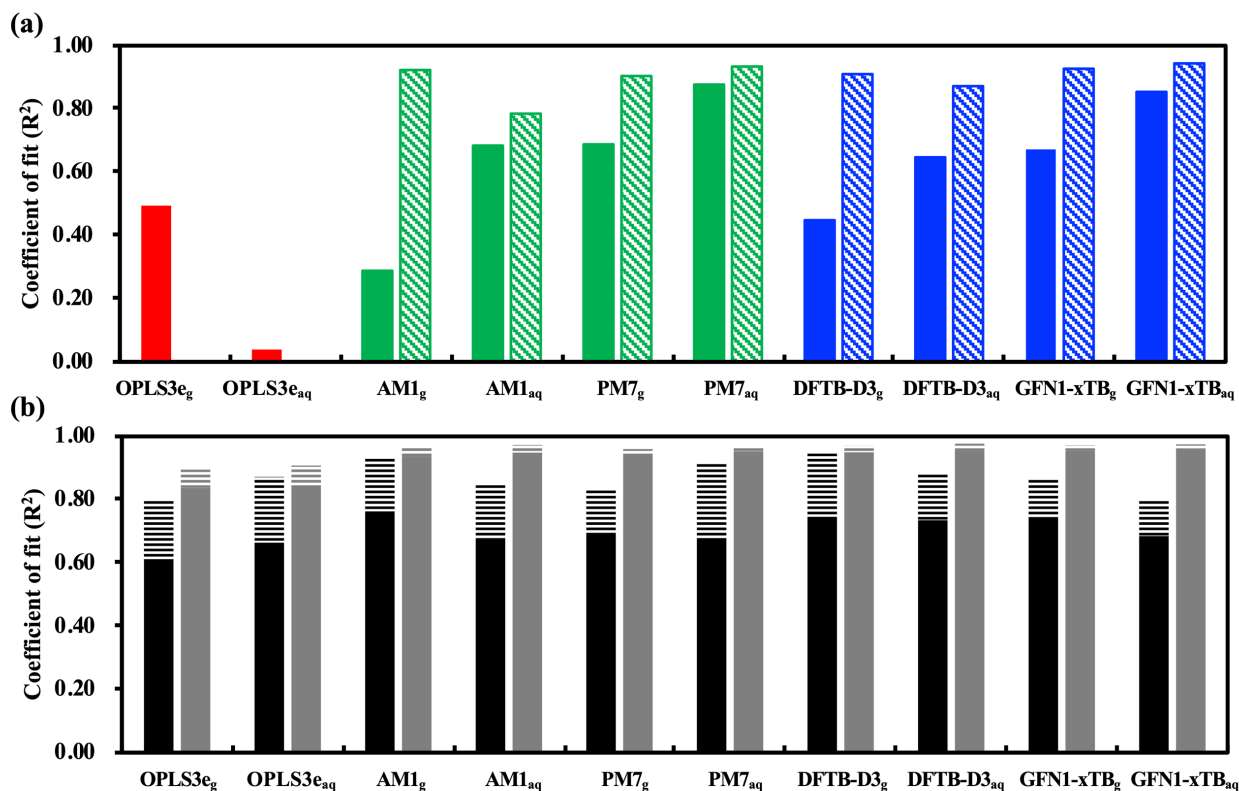

**Figure S4.** Performance comparisons of low-level methods: FF, SEQM and DFTB. **(a)** shows  $R^2$  for SPE values calculated at these three different levels of theory. Similarly, **(b)** shows  $R^2$  for PBE calculated SPE data on the geometries obtained from these three different levels of theory. In (a) the solid bars show  $R^2$  for SPE when using the  $\Delta E_{rxn}$  descriptor and the hashed bars show  $R^2$  for SPE when using the  $E_{LUMO}$  descriptor. In (b) the solid bars show the SPE results without the implicit solvation effect whereas the hashed bars show the results with the implicit solvation effects taken into account.

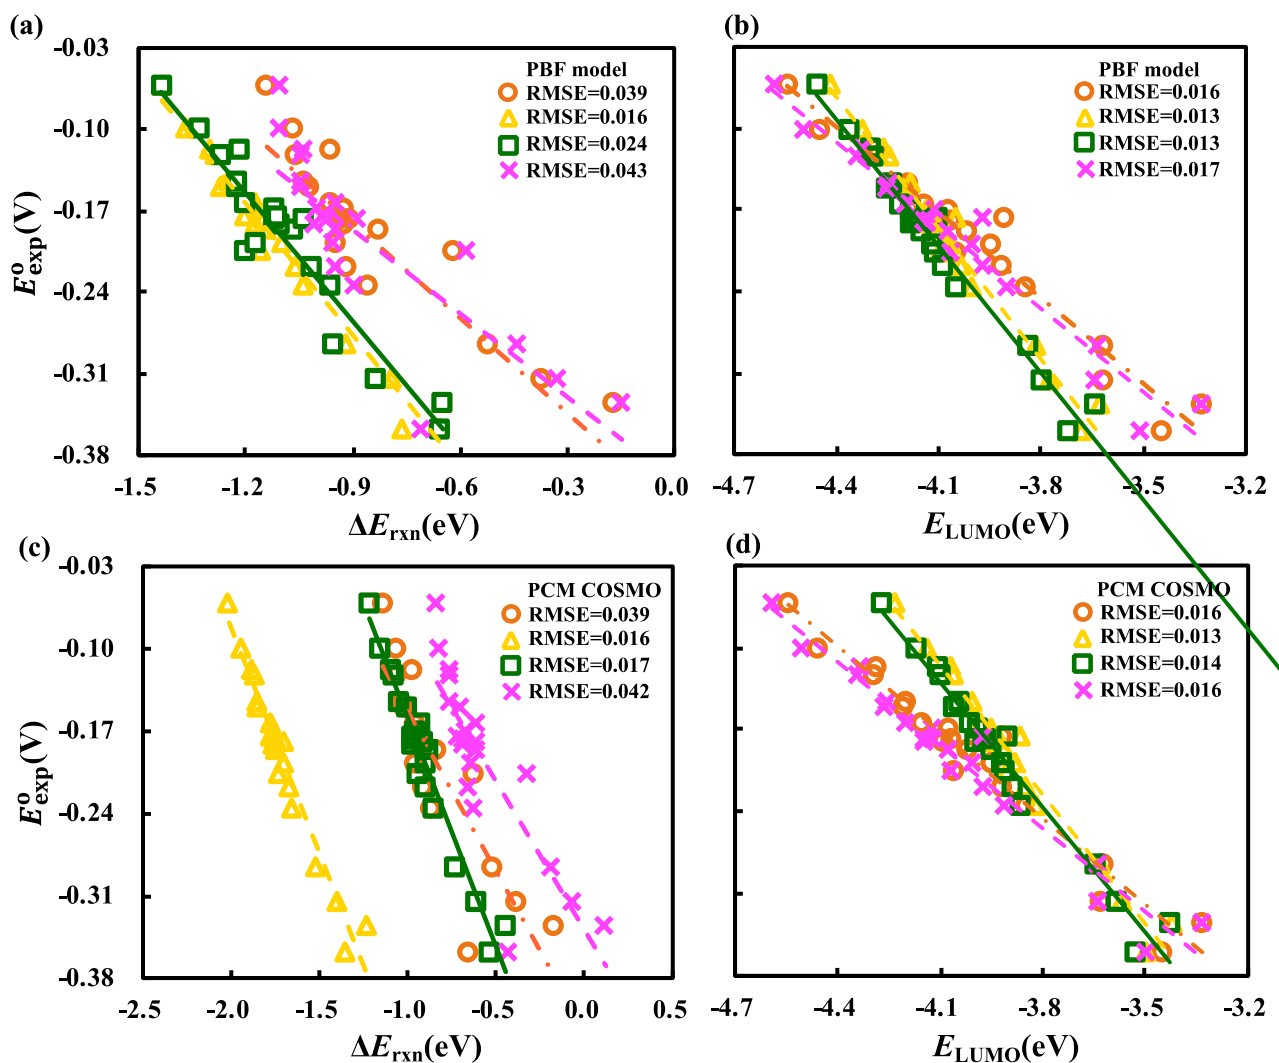

**Figure S5.** OPT and SPE using two different implicit solvation methods, PBF and PCM (COSMO), respectively. Color orange represents OPT and SPE in gas phase; Color yellow represents OPT in gas phase and SPE in solution phase; Color green represents OPT and SPE in solution phase; Color pink represents OPT in solution phase and SPE in gas phase.



**Table S1.** A summary of 2D structures, SMILES representations, experimentally measured redox potentials and the predicted redox potentials for 21 alloxazine-based molecules considered in this work. The measured redox potential values have been corrected versus RHE at pH = 7. When analyzing the performance of each descriptor, we divided the set of errors of the 21 molecule into three groups of seven molecules each. The seven molecules with the lowest errors under each approximation are colored yellow, the seven molecules with the highest errors are colored red and the seven in the middle are colored orange. 2D molecule representations have been created using ChemDraw Professional [version 18.0.0.231(4318)] <https://www.perkinelmer.com/product/chemdraw-professional-chemdrawpro>.

**(a)** The predicted redox potentials when using  $\Delta E_{\text{rxn}}$  as the descriptor calculated with PBE.

| # | Molecule                                                                                                                            | $E_{\text{exp}}^{\circ}$<br>(V) | $E_{\text{g}}^{\circ}$<br>(V) | $E_{\text{s}}^{\circ}$<br>(V) | $E_{\text{aq}}^{\circ}$<br>(V) | $\delta E = E_{\text{g}}^{\circ} - E_{\text{exp}}^{\circ}$ | $\delta E = E_{\text{s}}^{\circ} - E_{\text{exp}}^{\circ}$ | $\delta E = E_{\text{aq}}^{\circ} - E_{\text{exp}}^{\circ}$ | Ref |
|---|-------------------------------------------------------------------------------------------------------------------------------------|---------------------------------|-------------------------------|-------------------------------|--------------------------------|------------------------------------------------------------|------------------------------------------------------------|-------------------------------------------------------------|-----|
| 1 | 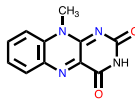<br>c1cccc(c12)nc3c(n2C)n<br>c(=O)[nH]c3=O        | -0.186                          | -0.200                        | -0.185                        | -0.204                         | -0.014                                                     | 0.001                                                      | -0.018                                                      | [1] |
| 2 | <br>c1cc(C)cc(c12)nc3c(n2<br>C)nc(=O)[nH]c3=O    | -0.198                          | -0.167                        | -0.202                        | -0.164                         | 0.031                                                      | -0.004                                                     | 0.034                                                       | [1] |
| 3 | <br>c1c(C)ccc(c12)nc3c(n2<br>C)nc(=O)[nH]c3=O    | -0.218                          | -0.176                        | -0.217                        | -0.223                         | 0.042                                                      | 0.001                                                      | -0.005                                                      | [1] |
| 4 | <br>c1c(C)c(C)cc(c12)nc3c(<br>n2C)nc(=O)[nH]c3=O | -0.235                          | -0.191                        | -0.225                        | -0.241                         | 0.044                                                      | 0.01                                                       | -0.006                                                      | [1] |
| 5 | <br>Cl                                           | -0.150                          | -0.147                        | -0.137                        | -0.144                         | 0.003                                                      | 0.013                                                      | 0.006                                                       | [1] |

|           |                                                                                                                                               |        |        |        |        |        |        |        |     |
|-----------|-----------------------------------------------------------------------------------------------------------------------------------------------|--------|--------|--------|--------|--------|--------|--------|-----|
|           | <chem>c1cc(Cl)cc(c12)nc3c(n2)C)nc(=O)[nH]c3=O</chem>                                                                                          |        |        |        |        |        |        |        |     |
| <b>6</b>  | 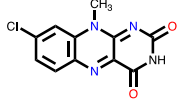<br><chem>c1c(Cl)ccc(c12)nc3c(n2)C)nc(=O)[nH]c3=O</chem>     | -0.164 | -0.163 | -0.174 | -0.153 | 0.001  | -0.01  | 0.011  | [1] |
| <b>7</b>  | <br><chem>c1c(Cl)c(Cl)cc(c12)nc3c(n2C)nc(=O)[nH]c3=O</chem>  | -0.117 | -0.163 | -0.127 | -0.150 | -0.046 | -0.01  | -0.033 | [1] |
| <b>8</b>  | <br><chem>c1c(Cl)c(C)cc(c12)nc3c(n2C)nc(=O)[nH]c3=O</chem>   | -0.169 | -0.172 | -0.178 | -0.185 | -0.003 | -0.009 | -0.016 | [1] |
| <b>9</b>  | <br><chem>c1c(C)c(Cl)cc(c12)nc3c(n2C)nc(=O)[nH]c3=O</chem> | -0.181 | -0.173 | -0.174 | -0.189 | 0.008  | 0.007  | -0.008 | [1] |
| <b>10</b> | <br><chem>c1cc(F)cc(c12)nc3c(n2)C)nc(=O)[nH]c3=O</chem>    | -0.145 | -0.143 | -0.145 | -0.147 | 0.002  | 0      | -0.002 | [1] |
| <b>11</b> | <br><chem>c1c(F)ccc(c12)nc3c(n2)C)nc(=O)[nH]c3=O</chem>    | -0.178 | -0.177 | -0.202 | -0.185 | 0.001  | -0.024 | -0.007 | [1] |
| <b>12</b> | <br><chem>c1c(C)c(F)cc(c12)nc3c(n2C)nc(=O)[nH]c3=O</chem>  | -0.177 | -0.171 | -0.182 | -0.214 | 0.006  | -0.005 | -0.037 | [1] |

|    |                                                                                                                                                  |        |        |        |        |        |        |        |     |
|----|--------------------------------------------------------------------------------------------------------------------------------------------------|--------|--------|--------|--------|--------|--------|--------|-----|
| 13 | 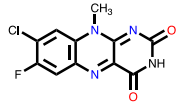<br><chem>c1c(Cl)c(F)cc(c12)nc3c(n2C)nc(=O)[nH]c3=O</chem>      | -0.123 | -0.137 | -0.132 | -0.128 | -0.014 | -0.009 | -0.005 | [1] |
| 14 | <br><chem>COc(c1)ccc(c12)n(C)c3c(n2)c(=O)[nH]c(n3)=O</chem>     | -0.175 | -0.169 | -0.163 | -0.187 | 0.006  | 0.012  | -0.012 | [1] |
| 15 | <br><chem>c1cc(N(C)C)cc(c12)n(C)c3c(n2)c(=O)[nH]c(n3)=O</chem>  | -0.359 | -0.246 | -0.328 | -0.355 | 0.113  | 0.031  | 0.004  | [1] |
| 16 | <br><chem>c1cc(C#N)cc(c12)n(C)c3c(n2)c(=O)[nH]c(n3)=O</chem>   | -0.062 | -0.115 | -0.075 | -0.068 | -0.053 | -0.013 | -0.006 | [1] |
| 17 | <br><chem>N#Cc(c1)ccc(c12)n(C)c3c(n2)c(=O)[nH]c(n3)=O</chem>  | -0.100 | -0.135 | -0.100 | -0.108 | -0.035 | 0      | -0.008 | [1] |
| 18 | <br><chem>c1c(C)c(C)cc(c12)nc3c(n2)c(=O)[nH]c(=O)[nH]3</chem> | -0.286 | -0.283 | -0.270 | -0.243 | 0.003  | 0.016  | 0.043  | [2] |
| 19 | <br><chem>OC(=O)c1ccc2c(c1)n(C)c(=O)[nH]2</chem>              | -0.206 | -0.257 | -0.180 | -0.152 | -0.051 | 0.026  | 0.054  | [2] |

|                                          |                                                                                                                                                                                    |        |        |        |        |            |             |            |     |
|------------------------------------------|------------------------------------------------------------------------------------------------------------------------------------------------------------------------------------|--------|--------|--------|--------|------------|-------------|------------|-----|
|                                          | <chem>O=C(O)c(c1ccc(c12)nc3c(n2)c(=O)[nH]c(=O)[nH]3</chem>                                                                                                                         |        |        |        |        |            |             |            |     |
| 20                                       | 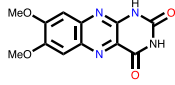<br><chem>COc(c1)c(OC)cc(c12)n</chem><br><chem>c3c(n2)c(=O)[nH]c(=O)</chem><br><chem>[nH]3</chem> | -0.336 | -0.378 | -0.373 | -0.358 | -0.042     | -0.037      | -0.022     | [2] |
| 21                                       | <br><chem>c1cc(O)cc(c12)nc3c(n2)</chem><br><chem>c(=O)[nH]c(=O)[nH]3</chem>                       | -0.316 | -0.323 | -0.319 | -0.289 | -0.007     | -0.003      | 0.027      | [2] |
| <b>MAE</b>                               |                                                                                                                                                                                    |        |        |        |        | 0.025      | 0.011       | 0.017      |     |
| <b>Maximum signed error [Molecule #]</b> |                                                                                                                                                                                    |        |        |        |        | 0.113 [15] | -0.037 [20] | 0.054 [19] |     |

(b) The predicted redox potentials when using  $E_{\text{LUMO}}$  as the descriptor calculated with PBE.

| # | Molecule                                                                                                                                                   | $E_{\text{exp}}^{\circ}$<br>(V) | $E_{\text{g}}^{\circ}$<br>(V) | $E_{\text{s}}^{\circ}$<br>(V) | $E_{\text{aq}}^{\circ}$<br>(V) | $\delta E = E_{\text{g}}^{\circ} - E_{\text{exp}}^{\circ}$ | $\delta E = E_{\text{s}}^{\circ} - E_{\text{exp}}^{\circ}$ | $\delta E = E_{\text{aq}}^{\circ} - E_{\text{exp}}^{\circ}$ | Ref |
|---|------------------------------------------------------------------------------------------------------------------------------------------------------------|---------------------------------|-------------------------------|-------------------------------|--------------------------------|------------------------------------------------------------|------------------------------------------------------------|-------------------------------------------------------------|-----|
| 1 | 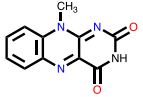<br><chem>c1cccc(c12)nc3c(n2C</chem><br><chem>)nc(=O)[nH]c3=O</chem>    | -0.186                          | -0.192                        | -0.185                        | -0.182                         | -0.006                                                     | 0.001                                                      | 0.004                                                       | [1] |
| 2 | <br><chem>c1cc(C)cc(c12)nc3c(n</chem><br><chem>2C)nc(=O)[nH]c3=O</chem> | -0.198                          | -0.209                        | -0.197                        | -0.193                         | -0.011                                                     | 0.001                                                      | 0.005                                                       | [1] |
| 3 | <br><chem>c1c(C)ccc(c12)nc3c(n</chem><br><chem>2C)nc(=O)[nH]c3=O</chem> | -0.218                          | -0.217                        | -0.208                        | -0.205                         | 0.001                                                      | 0.01                                                       | 0.013                                                       | [1] |

|    |                                                                                                                                               |        |        |        |        |        |        |        |     |
|----|-----------------------------------------------------------------------------------------------------------------------------------------------|--------|--------|--------|--------|--------|--------|--------|-----|
| 4  | 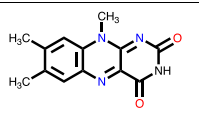<br><chem>c1c(C)c(C)cc(c12)nc3c(n2C)nc(=O)[nH]c3=O</chem>    | -0.235 | -0.234 | -0.220 | -0.218 | 0.001  | 0.015  | 0.017  | [1] |
| 5  | <br><chem>c1cc(Cl)cc(c12)nc3c(n2C)nc(=O)[nH]c3=O</chem>      | -0.150 | -0.147 | -0.146 | -0.146 | 0.003  | 0.004  | 0.004  | [1] |
| 6  | <br><chem>c1c(Cl)ccc(c12)nc3c(n2C)nc(=O)[nH]c3=O</chem>      | -0.164 | -0.160 | -0.158 | -0.158 | 0.004  | 0.006  | 0.006  | [1] |
| 7  | <br><chem>c1c(Cl)c(Cl)cc(c12)nc3c(n2C)nc(=O)[nH]c3=O</chem> | -0.117 | -0.127 | -0.125 | -0.128 | -0.01  | -0.008 | -0.011 | [1] |
| 8  | <br><chem>c1c(Cl)c(C)cc(c12)nc3c(n2C)nc(=O)[nH]c3=O</chem> | -0.169 | -0.179 | -0.170 | -0.171 | -0.01  | -0.001 | -0.002 | [1] |
| 9  | <br><chem>c1c(C)c(Cl)cc(c12)nc3c(n2C)nc(=O)[nH]c3=O</chem> | -0.181 | -0.174 | -0.170 | -0.170 | 0.007  | 0.011  | 0.011  | [1] |
| 10 | <br><chem>c1cc(F)cc(c12)nc3c(n2C)nc(=O)[nH]c3=O</chem>     | -0.145 | -0.149 | -0.154 | -0.152 | -0.004 | -0.009 | -0.007 | [1] |

|           |                                                                                                                                                |        |        |        |        |        |        |        |     |
|-----------|------------------------------------------------------------------------------------------------------------------------------------------------|--------|--------|--------|--------|--------|--------|--------|-----|
| <b>11</b> | 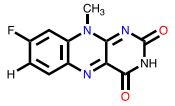<br><chem>c1c(F)ccc(c12)nc3c(n2C)nc(=O)[nH]c3=O</chem>        | -0.178 | -0.174 | -0.179 | -0.176 | 0.004  | -0.001 | 0.002  | [1] |
| <b>12</b> | <br><chem>c1c(C)c(F)cc(c12)nc3c(n2C)nc(=O)[nH]c3=O</chem>     | -0.177 | -0.180 | -0.181 | -0.178 | -0.003 | -0.004 | -0.001 | [1] |
| <b>13</b> | <br><chem>c1c(Cl)c(F)cc(c12)nc3c(n2C)nc(=O)[nH]c3=O</chem>    | -0.123 | -0.126 | -0.131 | -0.131 | -0.003 | -0.008 | -0.008 | [1] |
| <b>14</b> | <br><chem>COc(c1)ccc(c12)n(C)c3c(n2)c(=O)[nH]c3=O</chem>     | -0.175 | -0.218 | -0.204 | -0.199 | -0.043 | -0.029 | -0.024 | [1] |
| <b>15</b> | <br><chem>c1cc(N(C)C)cc(c12)n(C)c3c(n2)c(=O)[nH]c3=O</chem> | -0.359 | -0.331 | -0.341 | -0.339 | 0.028  | 0.018  | 0.02   | [1] |
| <b>16</b> | <br><chem>c1cc(C#N)cc(c12)n(C)c3c(n2)c(=O)[nH]c3=O</chem>   | -0.062 | -0.064 | -0.066 | -0.071 | -0.002 | -0.004 | -0.009 | [1] |
| <b>17</b> | <br><chem>c1cc(NC)cc(c12)n(C)c3c(n2)c(=O)[nH]c3=O</chem>    | -0.100 | -0.085 | -0.102 | -0.105 | 0.015  | -0.002 | -0.005 | [1] |

|                                          |                                                                                                                                                |        |        |        |        |             |             |             |     |
|------------------------------------------|------------------------------------------------------------------------------------------------------------------------------------------------|--------|--------|--------|--------|-------------|-------------|-------------|-----|
|                                          | <chem>N#Cc1ccc(c12)n(C)c3c(n2)c(=O)[nH]c(n3)=O</chem>                                                                                          |        |        |        |        |             |             |             |     |
| <b>18</b>                                | 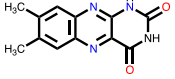<br><chem>c1c(C)c(C)cc(c12)nc3c(n2)c(=O)[nH]c(=O)[nH]3</chem> | -0.286 | -0.290 | -0.292 | -0.296 | -0.004      | -0.006      | -0.01       | [2] |
| <b>19</b>                                | <br><chem>O=C(O)c1ccc(c12)nc3c(n2)c(=O)[nH]c(=O)[nH]3</chem>  | -0.206 | -0.183 | -0.187 | -0.195 | 0.023       | 0.019       | 0.011       | [2] |
| <b>20</b>                                | <br><chem>COc1c(OC)cc(c12)nc3c(n2)c(=O)[nH]c(=O)[nH]3</chem> | -0.336 | -0.360 | -0.362 | -0.367 | -0.024      | -0.026      | -0.031      | [2] |
| <b>21</b>                                | <br><chem>c1cc(O)cc(c12)nc3c(n2)c(=O)[nH]c(=O)[nH]3</chem>  | -0.316 | -0.289 | -0.307 | -0.309 | 0.027       | 0.009       | 0.007       | [2] |
| <b>MAE</b>                               |                                                                                                                                                |        |        |        |        | 0.011       | 0.009       | 0.010       |     |
| <b>Maximum signed error [Molecule #]</b> |                                                                                                                                                |        |        |        |        | -0.043 [14] | -0.029 [14] | -0.031 [20] |     |

**Table S2.** Performance comparisons of the exchange-correlation functionals for the prediction of the experimentally measured redox potentials. DFT<sub>g</sub> represents both OPT and SPE in gas phase; DFT<sub>s</sub> represents OPT in gas-phase followed by SPE in SOL; DFT<sub>aq</sub> represents both OPT and SPE in SOL.

**(a)** R<sup>2</sup> and RMSE when using  $\Delta E_{\text{rxn}}$  as the descriptor

| Scheme for OPT and SPE | DFT <sub>g</sub> |          | DFT <sub>s</sub> |          | DFT <sub>aq</sub> |          |
|------------------------|------------------|----------|------------------|----------|-------------------|----------|
| DFT methods            | R <sup>2</sup>   | RMSE (V) | R <sup>2</sup>   | RMSE (V) | R <sup>2</sup>    | RMSE (V) |
| LDA                    | 0.801            | 0.035    | 0.944            | 0.019    | 0.880             | 0.027    |
| PBE                    | 0.756            | 0.039    | 0.959            | 0.016    | 0.910             | 0.024    |
| PBE-D3                 | 0.752            | 0.039    | 0.958            | 0.016    | 0.916             | 0.023    |
| BLYP                   | 0.741            | 0.040    | 0.958            | 0.016    | 0.935             | 0.020    |
| BLYP-D3                | 0.729            | 0.041    | 0.939            | 0.019    | 0.937             | 0.020    |
| B3LYP                  | 0.719            | 0.042    | 0.934            | 0.020    | 0.934             | 0.020    |
| B3LYP-D3               | 0.660            | 0.046    | 0.834            | 0.032    | 0.934             | 0.020    |
| PBE0                   | 0.725            | 0.041    | 0.939            | 0.019    | 0.927             | 0.021    |
| PBE0-D3                | 0.720            | 0.042    | 0.932            | 0.020    | 0.923             | 0.022    |
| HSE06                  | 0.711            | 0.042    | 0.922            | 0.022    | 0.925             | 0.022    |
| M08-HX                 | 0.680            | 0.044    | 0.875            | 0.028    | 0.907             | 0.024    |

**(b)** R<sup>2</sup> and RMSE when using  $E_{\text{LUMO}}$  as the descriptor

| Scheme for OPT and SPE | DFT <sub>g</sub> |          | DFT <sub>s</sub> |          | DFT <sub>aq</sub> |          |
|------------------------|------------------|----------|------------------|----------|-------------------|----------|
| DFT methods            | R <sup>2</sup>   | RMSE (V) | R <sup>2</sup>   | RMSE (V) | R <sup>2</sup>    | RMSE (V) |
| LDA                    | 0.958            | 0.016    | 0.973            | 0.013    | 0.971             | 0.013    |
| PBE                    | 0.956            | 0.016    | 0.974            | 0.013    | 0.972             | 0.013    |
| PBE-D3                 | 0.956            | 0.016    | 0.974            | 0.013    | 0.972             | 0.013    |
| BLYP                   | 0.955            | 0.017    | 0.974            | 0.013    | 0.974             | 0.013    |
| BLYP-D3                | 0.955            | 0.017    | 0.976            | 0.012    | 0.974             | 0.013    |
| B3LYP                  | 0.960            | 0.016    | 0.967            | 0.014    | 0.960             | 0.016    |
| B3LYP-D3               | 0.960            | 0.016    | 0.967            | 0.014    | 0.960             | 0.016    |
| PBE0                   | 0.960            | 0.016    | 0.961            | 0.015    | 0.952             | 0.017    |
| PBE0-D3                | 0.960            | 0.016    | 0.961            | 0.016    | 0.952             | 0.017    |
| HSE06                  | 0.961            | 0.015    | 0.966            | 0.015    | 0.958             | 0.016    |
| M08-HX                 | 0.961            | 0.015    | 0.943            | 0.019    | 0.927             | 0.021    |



(c)  $R^2$  and RMSE when using  $E_{\text{HOMO}}$  as the descriptor

| Scheme for OPT and SPE | DFT <sub>g</sub> |          | DFT <sub>s</sub> |          | DFT <sub>aq</sub> |          |
|------------------------|------------------|----------|------------------|----------|-------------------|----------|
|                        | $R^2$            | RMSE (V) | $R^2$            | RMSE (V) | $R^2$             | RMSE (V) |
| LDA                    | 0.770            | 0.038    | 0.801            | 0.035    | 0.803             | 0.035    |
| PBE                    | 0.743            | 0.040    | 0.700            | 0.043    | 0.731             | 0.041    |
| PBE-D3                 | 0.741            | 0.040    | 0.687            | 0.044    | 0.715             | 0.042    |
| BLYP                   | 0.732            | 0.041    | 0.678            | 0.045    | 0.684             | 0.044    |
| BLYP-D3                | 0.727            | 0.041    | 0.651            | 0.046    | 0.671             | 0.045    |
| B3LYP                  | 0.706            | 0.043    | 0.595            | 0.050    | 0.594             | 0.050    |
| B3LYP-D3               | 0.700            | 0.043    | 0.481            | 0.057    | 0.578             | 0.051    |
| PBE0                   | 0.711            | 0.042    | 0.592            | 0.050    | 0.568             | 0.052    |
| PBE0-D3                | 0.705            | 0.043    | 0.567            | 0.052    | 0.556             | 0.052    |
| HSE06                  | 0.729            | 0.041    | 0.542            | 0.053    | 0.604             | 0.049    |
| M08-HX                 | 0.615            | 0.049    | 0.325            | 0.064    | 0.363             | 0.063    |

**Table S3.** Performance comparisons of nine different SEQM methods for the prediction of experimentally measured redox potentials. SEQM<sub>g</sub> represents OPT or SPE in gas-phase. PBE<sub>g</sub> and B3LYP<sub>g</sub> represent SPE calculation in gas-phase with the two respective functionals. PBE<sub>s</sub> and B3LYP<sub>s</sub> represent SPE calculation in SOL and with the two respective functionals.

**(a)** R<sup>2</sup> and RMSE when using  $\Delta E_{\text{rxn}}$  as the descriptor

| Scheme for<br>OPT and SPE | OPT:SEQM <sub>g</sub><br>SPE:SEQM <sub>g</sub> |         | OPT:SEQM <sub>g</sub><br>SPE:PBE <sub>g</sub> |         | OPT:SEQM <sub>g</sub><br>SPE:PBE <sub>s</sub> |         | OPT: SEQM <sub>g</sub><br>SPE: B3LYP <sub>g</sub> |         | OPT: SEQM <sub>g</sub><br>SPE: B3LYP <sub>s</sub> |         |
|---------------------------|------------------------------------------------|---------|-----------------------------------------------|---------|-----------------------------------------------|---------|---------------------------------------------------|---------|---------------------------------------------------|---------|
|                           | R <sup>2</sup>                                 | RMSE(V) | R <sup>2</sup>                                | RMSE(V) | R <sup>2</sup>                                | RMSE(V) | R <sup>2</sup>                                    | RMSE(V) | R <sup>2</sup>                                    | RMSE(V) |
| AM1                       | 0.288                                          | 0.066   | 0.763                                         | 0.038   | 0.932                                         | 0.020   | 0.707                                             | 0.043   | 0.933                                             | 0.020   |
| MNDO                      | 0.100                                          | 0.074   | 0.630                                         | 0.048   | 0.823                                         | 0.033   | 0.576                                             | 0.051   | 0.818                                             | 0.034   |
| MNDOD                     | 0.206                                          | 0.070   | 0.650                                         | 0.046   | 0.845                                         | 0.031   | 0.595                                             | 0.050   | 0.830                                             | 0.032   |
| PM3                       | 0.502                                          | 0.055   | 0.737                                         | 0.040   | 0.946                                         | 0.018   | 0.683                                             | 0.044   | 0.919                                             | 0.022   |
| PM6                       | 0.598                                          | 0.050   | 0.773                                         | 0.037   | 0.866                                         | 0.029   | 0.727                                             | 0.041   | 0.881                                             | 0.027   |
| PM6-D3                    | 0.598                                          | 0.050   | 0.778                                         | 0.037   | 0.914                                         | 0.023   | 0.722                                             | 0.041   | 0.918                                             | 0.022   |
| PM6-D3H4X                 | 0.591                                          | 0.050   | 0.753                                         | 0.039   | 0.821                                         | 0.033   | 0.710                                             | 0.042   | 0.842                                             | 0.031   |
| PM7                       | 0.688                                          | 0.044   | 0.691                                         | 0.044   | 0.834                                         | 0.032   | 0.666                                             | 0.045   | 0.837                                             | 0.032   |
| RM1                       | 0.523                                          | 0.054   | 0.816                                         | 0.034   | 0.954                                         | 0.017   | 0.816                                             | 0.034   | 0.976                                             | 0.012   |

**(b)** R<sup>2</sup> and RMSE when using  $E_{\text{LUMO}}$  as the descriptor

| Scheme for<br>OPT and SPE | OPT:SEQM <sub>g</sub><br>SPE:SEQM <sub>g</sub> |         | OPT:SEQM <sub>g</sub><br>SPE:PBE <sub>g</sub> |         | OPT:SEQM <sub>g</sub><br>SPE:PBE <sub>s</sub> |         | OPT: SEQM <sub>g</sub><br>SPE: B3LYP <sub>g</sub> |         | OPT: SEQM <sub>g</sub><br>SPE: B3LYP <sub>s</sub> |         |
|---------------------------|------------------------------------------------|---------|-----------------------------------------------|---------|-----------------------------------------------|---------|---------------------------------------------------|---------|---------------------------------------------------|---------|
|                           | R <sup>2</sup>                                 | RMSE(V) | R <sup>2</sup>                                | RMSE(V) | R <sup>2</sup>                                | RMSE(V) | R <sup>2</sup>                                    | RMSE(V) | R <sup>2</sup>                                    | RMSE(V) |
| AM1                       | 0.923                                          | 0.022   | 0.938                                         | 0.020   | 0.965                                         | 0.015   | 0.947                                             | 0.018   | 0.963                                             | 0.015   |
| MNDO                      | 0.874                                          | 0.028   | 0.936                                         | 0.020   | 0.962                                         | 0.015   | 0.947                                             | 0.018   | 0.961                                             | 0.016   |
| MNDOD                     | 0.857                                          | 0.030   | 0.938                                         | 0.020   | 0.963                                         | 0.015   | 0.948                                             | 0.018   | 0.960                                             | 0.016   |
| PM3                       | 0.875                                          | 0.028   | 0.918                                         | 0.023   | 0.945                                         | 0.018   | 0.926                                             | 0.021   | 0.936                                             | 0.020   |
| PM6                       | 0.903                                          | 0.024   | 0.933                                         | 0.020   | 0.954                                         | 0.017   | 0.942                                             | 0.019   | 0.954                                             | 0.017   |
| PM6-D3                    | 0.903                                          | 0.025   | 0.934                                         | 0.020   | 0.955                                         | 0.017   | 0.942                                             | 0.019   | 0.955                                             | 0.017   |
| PM6-D3H4X                 | 0.907                                          | 0.024   | 0.934                                         | 0.020   | 0.953                                         | 0.017   | 0.945                                             | 0.018   | 0.960                                             | 0.016   |
| PM7                       | 0.904                                          | 0.024   | 0.945                                         | 0.018   | 0.960                                         | 0.016   | 0.955                                             | 0.017   | 0.962                                             | 0.015   |
| RM1                       | 0.919                                          | 0.022   | 0.940                                         | 0.019   | 0.962                                         | 0.015   | 0.940                                             | 0.019   | 0.966                                             | 0.014   |

**Table S4.** Performance comparisons of nine different SEQM methods for prediction of experimentally measured redox potentials. SEQM<sub>aq</sub> represents OPT or SPE in SOL. PBE<sub>g</sub> and B3LYP<sub>g</sub> represent SPE calculation in gas-phase with the two respective functionals. PBE<sub>s</sub> and B3LYP<sub>s</sub> represent SPE calculation in SOL and with the two respective functionals.

**(a)** R<sup>2</sup> and RMSE when using  $\Delta E_{\text{rxn}}$  as the descriptor

| Scheme for<br>OPT and SPE | OPT:SEQM <sub>aq</sub> |         | OPT:SEQM <sub>aq</sub> |         | OPT:SEQM <sub>aq</sub> |         | OPT: SEQM <sub>aq</sub> |         | OPT: SEQM <sub>aq</sub> |         |
|---------------------------|------------------------|---------|------------------------|---------|------------------------|---------|-------------------------|---------|-------------------------|---------|
|                           | SPE:SEQM <sub>aq</sub> |         | SPE:PBE <sub>g</sub>   |         | SPE:PBE <sub>s</sub>   |         | SPE: B3LYP <sub>g</sub> |         | SPE: B3LYP <sub>s</sub> |         |
| Method                    | R <sup>2</sup>         | RMSE(V) | R <sup>2</sup>         | RMSE(V) | R <sup>2</sup>         | RMSE(V) | R <sup>2</sup>          | RMSE(V) | R <sup>2</sup>          | RMSE(V) |
| AM1                       | 0.684                  | 0.044   | 0.676                  | 0.045   | 0.850                  | 0.030   | 0.656                   | 0.046   | 0.846                   | 0.031   |
| MNDO                      | 0.448                  | 0.058   | 0.490                  | 0.056   | 0.803                  | 0.035   | 0.477                   | 0.057   | 0.812                   | 0.034   |
| MNDOD                     | 0.424                  | 0.060   | 0.489                  | 0.056   | 0.817                  | 0.034   | 0.470                   | 0.057   | 0.819                   | 0.033   |
| PM3                       | 0.678                  | 0.045   | 0.789                  | 0.036   | 0.892                  | 0.026   | 0.765                   | 0.038   | 0.928                   | 0.021   |
| PM6                       | 0.820                  | 0.033   | 0.712                  | 0.042   | 0.928                  | 0.021   | 0.673                   | 0.045   | 0.927                   | 0.021   |
| PM6-D3                    | 0.817                  | 0.034   | 0.699                  | 0.043   | 0.914                  | 0.023   | 0.660                   | 0.046   | 0.911                   | 0.023   |
| PM6-D3H4X                 | 0.801                  | 0.035   | 0.678                  | 0.045   | 0.855                  | 0.030   | 0.634                   | 0.048   | 0.851                   | 0.030   |
| PM7                       | 0.877                  | 0.028   | 0.678                  | 0.045   | 0.917                  | 0.023   | 0.632                   | 0.048   | 0.895                   | 0.025   |
| RM1                       | 0.804                  | 0.035   | 0.692                  | 0.044   | 0.855                  | 0.030   | 0.662                   | 0.046   | 0.881                   | 0.027   |

**(b)** R<sup>2</sup> and RMSE when using  $E_{\text{LUMO}}$  as the descriptor

| Scheme for<br>OPT and SPE | OPT:SEQM <sub>aq</sub> |         | OPT:SEQM <sub>aq</sub> |         | OPT:SEQM <sub>aq</sub> |         | OPT: SEQM <sub>aq</sub> |         | OPT: SEQM <sub>aq</sub> |         |
|---------------------------|------------------------|---------|------------------------|---------|------------------------|---------|-------------------------|---------|-------------------------|---------|
|                           | SPE:SEQM <sub>aq</sub> |         | SPE:PBE <sub>g</sub>   |         | SPE:PBE <sub>s</sub>   |         | SPE: B3LYP <sub>g</sub> |         | SPE: B3LYP <sub>s</sub> |         |
| Method                    | R <sup>2</sup>         | RMSE(V) | R <sup>2</sup>         | RMSE(V) | R <sup>2</sup>         | RMSE(V) | R <sup>2</sup>          | RMSE(V) | R <sup>2</sup>          | RMSE(V) |
| AM1                       | 0.785                  | 0.036   | 0.949                  | 0.018   | 0.973                  | 0.013   | 0.957                   | 0.016   | 0.967                   | 0.014   |
| MNDO                      | 0.660                  | 0.046   | 0.966                  | 0.014   | 0.976                  | 0.012   | 0.958                   | 0.016   | 0.942                   | 0.019   |
| MNDOD                     | 0.668                  | 0.045   | 0.965                  | 0.015   | 0.975                  | 0.012   | 0.958                   | 0.016   | 0.941                   | 0.019   |
| PM3                       | 0.700                  | 0.043   | 0.936                  | 0.020   | 0.951                  | 0.017   | 0.938                   | 0.020   | 0.928                   | 0.021   |
| PM6                       | 0.927                  | 0.021   | 0.944                  | 0.019   | 0.961                  | 0.016   | 0.943                   | 0.019   | 0.951                   | 0.017   |
| PM6-D3                    | 0.927                  | 0.021   | 0.944                  | 0.019   | 0.960                  | 0.016   | 0.944                   | 0.019   | 0.951                   | 0.017   |
| PM6-D3H4X                 | 0.929                  | 0.021   | 0.943                  | 0.019   | 0.959                  | 0.016   | 0.942                   | 0.019   | 0.951                   | 0.017   |
| PM7                       | 0.934                  | 0.020   | 0.953                  | 0.017   | 0.965                  | 0.015   | 0.955                   | 0.017   | 0.951                   | 0.017   |
| RM1                       | 0.839                  | 0.031   | 0.955                  | 0.017   | 0.967                  | 0.014   | 0.961                   | 0.016   | 0.963                   | 0.015   |

**Table S5.** Performance comparisons of FF(OPLS3e) in combination with the different DFT methods for the prediction of experimentally measured redox potentials. FF<sub>g</sub> represents OPT or SPE in gas-phase. FF<sub>aq</sub> represents OPT or SPE in SOL. PBE<sub>g</sub> and B3LYP<sub>g</sub>, represent SPE calculation in gas-phase with the two respective functionals. PBE<sub>s</sub> and B3LYP<sub>s</sub> represent SPE calculation in SOL and with the two respective functionals.

**(a)** R<sup>2</sup> and RMSE when using  $\Delta E_{\text{rxn}}$  as the descriptor

| Scheme for<br>OPT and SPE | OPT:FF <sub>g</sub><br>SPE:FF <sub>g</sub>   |         | OPT: FF <sub>g</sub><br>SPE: PBE <sub>g</sub>  |         | OPT: FF <sub>g</sub><br>SPE: PBE <sub>s</sub>  |         | OPT: FF <sub>g</sub><br>SPE: B3LYP <sub>g</sub>  |         | OPT: FF <sub>g</sub><br>SPE: B3LYP <sub>s</sub>  |         |
|---------------------------|----------------------------------------------|---------|------------------------------------------------|---------|------------------------------------------------|---------|--------------------------------------------------|---------|--------------------------------------------------|---------|
| Method                    | R <sup>2</sup>                               | RMSE(V) | R <sup>2</sup>                                 | RMSE(V) | R <sup>2</sup>                                 | RMSE(V) | R <sup>2</sup>                                   | RMSE(V) | R <sup>2</sup>                                   | RMSE(V) |
| OPLS3e                    | 0.494                                        | 0.056   | 0.612                                          | 0.049   | 0.798                                          | 0.035   | 0.647                                            | 0.047   | 0.767                                            | 0.038   |
| Scheme for<br>OPT and SPE | OPT:FF <sub>aq</sub><br>SPE:FF <sub>aq</sub> |         | OPT: FF <sub>aq</sub><br>SPE: PBE <sub>g</sub> |         | OPT: FF <sub>aq</sub><br>SPE: PBE <sub>s</sub> |         | OPT: FF <sub>aq</sub><br>SPE: B3LYP <sub>g</sub> |         | OPT: FF <sub>aq</sub><br>SPE: B3LYP <sub>s</sub> |         |
| Method                    | R <sup>2</sup>                               | RMSE(V) | R <sup>2</sup>                                 | RMSE(V) | R <sup>2</sup>                                 | RMSE(V) | R <sup>2</sup>                                   | RMSE(V) | R <sup>2</sup>                                   | RMSE(V) |
| OPLS3e                    | 0.039                                        | 0.077   | 0.664                                          | 0.046   | 0.872                                          | 0.028   | 0.644                                            | 0.047   | 0.815                                            | 0.034   |

**(b)** R<sup>2</sup> and RMSE when using  $E_{\text{LUMO}}$  as the descriptor

| Scheme for<br>OPT and SPE | OPT: FF <sub>g</sub><br>SPE: PBE <sub>g</sub>   |         | OPT: FF <sub>g</sub><br>SPE: PBE <sub>s</sub>  |         | OPT: FF <sub>g</sub><br>SPE: B3LYP <sub>g</sub>  |         | OPT: FF <sub>g</sub><br>SPE: B3LYP <sub>s</sub>  |         |
|---------------------------|-------------------------------------------------|---------|------------------------------------------------|---------|--------------------------------------------------|---------|--------------------------------------------------|---------|
| Method                    | R <sup>2</sup>                                  | RMSE(V) | R <sup>2</sup>                                 | RMSE(V) | R <sup>2</sup>                                   | RMSE(V) | R <sup>2</sup>                                   | RMSE(V) |
| OPLS3e                    | 0.837                                           | 0.032   | 0.895                                          | 0.025   | 0.847                                            | 0.031   | 0.914                                            | 0.023   |
| Scheme for<br>OPT and SPE | OPT: FF <sub>aq</sub><br>SPE: PBE <sub>aq</sub> |         | OPT: FF <sub>aq</sub><br>SPE: PBE <sub>s</sub> |         | OPT: FF <sub>aq</sub><br>SPE: B3LYP <sub>g</sub> |         | OPT: FF <sub>aq</sub><br>SPE: B3LYP <sub>s</sub> |         |
| Method                    | R <sup>2</sup>                                  | RMSE(V) | R <sup>2</sup>                                 | RMSE(V) | R <sup>2</sup>                                   | RMSE(V) | R <sup>2</sup>                                   | RMSE(V) |
| OPLS3e                    | 0.845                                           | 0.031   | 0.908                                          | 0.024   | 0.855                                            | 0.030   | 0.925                                            | 0.021   |

**Table S6.** Performance comparisons of the two different DFTB methods for the prediction of experimentally measured redox potentials. DFTB<sub>g</sub> represents OPT or SPE in gas-phase. PBE<sub>g</sub> and B3LYP<sub>g</sub> represent SPE calculation in gas-phase with the two respective functionals. PBE<sub>s</sub> and B3LYP<sub>s</sub> represent SPE calculation in SOL and with the two respective functionals.

**(a)** R<sup>2</sup> and RMSE when using  $\Delta E_{\text{rxn}}$  as the descriptor

| Scheme for<br>OPT and SPE | OPT:DFTB <sub>g</sub> |         | OPT: DFTB <sub>g</sub> |         | OPT: DFTB <sub>g</sub> |         | OPT: DFTB <sub>g</sub>  |         | OPT: DFTB <sub>g</sub>  |         |
|---------------------------|-----------------------|---------|------------------------|---------|------------------------|---------|-------------------------|---------|-------------------------|---------|
|                           | SPE:DFTB <sub>g</sub> |         | SPE: PBE <sub>g</sub>  |         | SPE: PBE <sub>s</sub>  |         | SPE: B3LYP <sub>g</sub> |         | SPE: B3LYP <sub>s</sub> |         |
| Method                    | R <sup>2</sup>        | RMSE(V) | R <sup>2</sup>         | RMSE(V) | R <sup>2</sup>         | RMSE(V) | R <sup>2</sup>          | RMSE(V) | R <sup>2</sup>          | RMSE(V) |
| DFTB-D3                   | 0.448                 | 0.058   | 0.746                  | 0.040   | 0.946                  | 0.018   | 0.715                   | 0.042   | 0.925                   | 0.021   |
| GFN1-xTB                  | 0.672                 | 0.045   | 0.744                  | 0.040   | 0.863                  | 0.029   | 0.704                   | 0.043   | 0.854                   | 0.030   |

**(b)** R<sup>2</sup> and RMSE when using  $E_{\text{LUMO}}$  as the descriptor

| Scheme for<br>OPT and SPE | OPT:DFTB <sub>g</sub> |         | OPT: DFTB <sub>g</sub> |         | OPT: DFTB <sub>g</sub> |         | OPT: DFTB <sub>g</sub>  |         | OPT: DFTB <sub>g</sub>  |         |
|---------------------------|-----------------------|---------|------------------------|---------|------------------------|---------|-------------------------|---------|-------------------------|---------|
|                           | SPE:DFTB <sub>g</sub> |         | SPE: PBE <sub>g</sub>  |         | SPE: PBE <sub>s</sub>  |         | SPE: B3LYP <sub>g</sub> |         | SPE: B3LYP <sub>s</sub> |         |
| Method                    | R <sup>2</sup>        | RMSE(V) | R <sup>2</sup>         | RMSE(V) | R <sup>2</sup>         | RMSE(V) | R <sup>2</sup>          | RMSE(V) | R <sup>2</sup>          | RMSE(V) |
| DFTB-D3                   | 0.910                 | 0.024   | 0.950                  | 0.018   | 0.971                  | 0.013   | 0.947                   | 0.018   | 0.948                   | 0.018   |
| GFN1-xTB                  | 0.927                 | 0.021   | 0.954                  | 0.017   | 0.972                  | 0.013   | 0.960                   | 0.016   | 0.972                   | 0.013   |

**Table S7.** Performance comparisons of two different DFTB methods for the prediction of experimentally measured redox potentials. DFTB<sub>aq</sub> represents OPT or SPE in SOL. PBE<sub>g</sub> and B3LYP<sub>g</sub> represent SPE calculation in gas-phase with the two respective functionals. PBE<sub>s</sub> and B3LYP<sub>s</sub> represent SPE calculation in SOL and with the two respective functionals.

**(a)** R<sup>2</sup> and RMSE when using  $\Delta E_{\text{rxn}}$  as the descriptor

| Scheme for<br>OPT and SPE | OPT:DFTB <sub>aq</sub> |         | OPT: DFTB <sub>aq</sub> |         | OPT: DFTB <sub>aq</sub> |         | OPT: DFTB <sub>aq</sub> |         | OPT: DFTB <sub>aq</sub> |         |
|---------------------------|------------------------|---------|-------------------------|---------|-------------------------|---------|-------------------------|---------|-------------------------|---------|
|                           | SPE:DFTB <sub>aq</sub> |         | SPE: PBE <sub>g</sub>   |         | SPE: PBE <sub>s</sub>   |         | SPE: B3LYP <sub>g</sub> |         | SPE: B3LYP <sub>s</sub> |         |
| Method                    | R <sup>2</sup>         | RMSE(V) | R <sup>2</sup>          | RMSE(V) | R <sup>2</sup>          | RMSE(V) | R <sup>2</sup>          | RMSE(V) | R <sup>2</sup>          | RMSE(V) |
| DFTB-D3                   | 0.647                  | 0.047   | 0.735                   | 0.040   | 0.881                   | 0.027   | 0.703                   | 0.043   | 0.885                   | 0.027   |
| GFN1-xTB                  | 0.854                  | 0.030   | 0.685                   | 0.044   | 0.801                   | 0.035   | 0.642                   | 0.047   | 0.811                   | 0.034   |

**(b)** R<sup>2</sup> and RMSE when using  $E_{\text{LUMO}}$  as the descriptor

| Scheme for<br>OPT and SPE | OPT:DFTB <sub>aq</sub> |         | OPT: DFTB <sub>aq</sub> |         | OPT: DFTB <sub>aq</sub> |         | OPT: DFTB <sub>aq</sub> |         | OPT: DFTB <sub>aq</sub> |         |
|---------------------------|------------------------|---------|-------------------------|---------|-------------------------|---------|-------------------------|---------|-------------------------|---------|
|                           | SPE:DFTB <sub>aq</sub> |         | SPE: PBE <sub>g</sub>   |         | SPE: PBE <sub>s</sub>   |         | SPE: B3LYP <sub>g</sub> |         | SPE: B3LYP <sub>s</sub> |         |
| Method                    | R <sup>2</sup>         | RMSE(V) | R <sup>2</sup>          | RMSE(V) | R <sup>2</sup>          | RMSE(V) | R <sup>2</sup>          | RMSE(V) | R <sup>2</sup>          | RMSE(V) |
| DFTB-D3                   | 0.872                  | 0.028   | 0.955                   | 0.017   | 0.977                   | 0.012   | 0.951                   | 0.017   | 0.961                   | 0.016   |
| GFN1-xTB                  | 0.944                  | 0.019   | 0.961                   | 0.016   | 0.975                   | 0.012   | 0.962                   | 0.015   | 0.971                   | 0.013   |

## DFT calculation details

As DFT options in Jaguar, a medium grid density for OPT and a fine grid density for SPE calculations have been used. Energy and RMS density matrix change convergence criteria are set to the default values of  $5.0 \times 10^{-5}$  and  $5.0 \times 10^{-6}$  Hartree, respectively. The direct inversion in the iterative subspace is employed as the convergence scheme. For OPT, we used Jaguar's mixed pseudospectral grids with default cutoffs. For SPE calculations, we used pseudospectral grids with accurate cutoffs. To treat the solvated molecules in water, we used the PBF solver.<sup>3,4</sup> The calculations are performed with LACVP<sup>\*\*++</sup> basis set with polarization and diffuse functions.<sup>5,6</sup> The LACVP basis set includes effective core potentials (ECP), which represent the core electrons in a parametrized form. Therefore, ECPs speed up calculations meanwhile enabling calculations on heavy elements at similar computing costs as for the calculations on light elements. We note that for the elements from H to Ar, such as in the current work, the widely employed 6-31G basis and the LACVP are essentially the same. The alloxazines considered in this work contain C, H, O, N, F and Cl atoms, and thus, the use of LACVP<sup>\*\*++</sup> basis in this work is consistent with a 6-31G<sup>\*\*++</sup> basis.

## References for Supplementary Information

1. Hasford, J. J. & Rizzo, C. J. Linear free energy substituent effect on flavin redox chemistry. *J. Am. Chem. Soc.* **120**, 2251–2255 (1998).
2. Lin, K. *et al.* A redox-flow battery with an alloxazine-based organic electrolyte. *Nat. Energy* **1**, 16102 (2016).
3. Tannor, D. J. *et al.* Accurate First Principles Calculation of Molecular Charge Distributions and Solvation Energies from Ab Initio Quantum Mechanics and Continuum Dielectric Theory. *J. Am. Chem. Soc.* **116**, 11875–11882 (1994).
4. Bochevarov, A. D. *et al.* Jaguar: A high-performance quantum chemistry software program with strengths in life and materials sciences. *Int. J. Quantum Chem.* **113**, 2110–2142 (2013)
5. Hay, P. J. & Wadt, W. R. Ab Initio Effective Core Potentials for Molecular Calculations. Potentials. for K to Au Including the Outermost Core Orbitale. *J. Chem. Phys.* **82**, 299–310 (1985).
6. Jaguar, version 10.5. Schrödinger, Inc., New York, NY, 2019.
